# Supplementary material
Source: Elsevier journal article supplement (https://www.sciencedirect.com/science/article/pii/S2530064418300798)
Supplement: mmc1 [file S2530064418300798:mmc1.docx]

| Family | Probable species | Probable origin | Ocurrence in Brazilian Biomes |
| --- | --- | --- | --- |
| Acanthaceae | *Hemigraphis alternata* | Nearctic |  |
| Acanthaceae | *Hygrophila difformis* | Oriental |  |
| Acanthaceae | *Hygrophila polysperma* | Oriental |  |
| Acanthaceae | *Hygrophila ringens* | unknown/cosmopolitan |  |
| Acanthaceae | *Hygrophila stricta* | Palaearctic |  |
| Acanthaceae | *Hygrophila balsamica* | Oriental |  |
| Acanthaceae | *Hygrophila corymbosa* | Oriental |  |
| Acanthaceae | *Hygrophila costata* | Brazil (native) | Amazônia, Caatinga, Cerrado, Mata Atlântica |
| Acanthaceae | *Staurogyne repens* | Brazil (native) | Amazônia, Cerrado |
| Acoraceae | *Acorus calamus* | Oriental |  |
| Acoraceae | *Acorus gramineus* | Palaearctic |  |
| Alismataceae | *Echinodorus aschersonianus* | Brazil (native) | Mata Atlântica |
| Alismataceae | *Echinodorus berteroi* | Neotropical (out of Brazil) |  |
| Alismataceae | *Echinodorus bracteatus* | Neotropical (out of Brazil) |  |
| Alismataceae | *Echinodorus ellipticus* | unknown/cosmopolitan |  |
| Alismataceae | *Echinodorus gabrielii* | Brazil (native) | Amazônia, Caatinga, Cerrado |
| Alismataceae | *Echinodorus grisebachii* | Brazil (native) | Amazônia, Cerrado |
| Alismataceae | *Echinodorus horizontalis* | Brazil (native) | Amazônia |
| Alismataceae | *Echinodorus macrophyllus* | Brazil (native) | Amazônia, Caatinga, Cerrado, Mata Atlântica, Pantanal |
| Alismataceae | *Echinodorus martii* | Brazil (native) | Amazônia, Caatinga, Cerrado |
| Alismataceae | *Echinodorus nymphaeifolius* | unknown/cosmopolitan |  |
| Alismataceae | *Echinodorus opacus* | Brazil (native) | Mata Atlântica |
| Alismataceae | *Echinodorus paniculatus* | Brazil (native) | Amazônia, Caatinga, Cerrado, Mata Atlântica |
| Alismataceae | *Echinodorus portoalegrensis* | Brazil (native) | Mata Atlântica |
| Alismataceae | *Echinodorus schlueteri* | unknown/cosmopolitan |  |
| Alismataceae | *Echinodorus subalatus* | Brazil (native) | Amazonia, Caatinga, Cerrado |
| Alismataceae | *Echinodorus trialatus* | Brazil (native) | Cerrado, Pantanal |
| Alismataceae | *Echinodorus tunicatus* | Neotropical (out of Brazil) |  |
| Alismataceae | *Echinodorus uruguayensis* | Brazil (native) | Mata Atlântica |
| Alismataceae | *Echinodorus virgatus* | Neotropical (out of Brazil) |  |
| Alismataceae | *Echinodorus x barthii* | unknown/cosmopolitan |  |
| Alismataceae | *Helanthium bolivianum* | Brazil (native) | Cerrado |
| Alismataceae | *Helanthium tenellum* | unknown/cosmopolitan |  |
| Alismataceae | *Hydrocleys nymphoides* | Brazil (native) | Caatinga, Cerrado, Mata Atlântica, Pantanal |
| Alismataceae | *Limnocharis flava* | Brazil (native) | Amazônia, Caatinga, Cerrado, Mata Atlântica, Pantanal |
| Alismataceae | *Sagittaria graminea* | Nearctic |  |
| Alismataceae | *Sagittaria montevidensis* | Brazil (native) | Amazônia, Cerrado, Mata Atlântica |
| Alismataceae | *Sagittaria natans* | Palaearctic |  |
| Alismataceae | *Sagittaria platyphylla* | Nearctic |  |
| Alismataceae | *Sagittaria subulata* | Neotropical (out of Brazil) |  |
| Alismataceae | *Sagittaria guayanensis* | Brazil (native) | Amazônia, Caatinga, Cerrado, Mata Atlântica |
| Amaranthaceae | *Alternanthera dentata* | Brazil (native) | Amazônia, Caatinga, Cerrado, Mata Atlântica |
| Amaranthaceae | *Alternanthera tenella* | Brazil (native) | Amazônia, Caatinga, Cerrado, Mata Atlântica, Pampa, Pantanal |
| Amaranthaceae | *Alternanthera reineckii* | Brazil (native) | Cerrado, Pantanal |
| Amaranthaceae | *Alternanthera sessillis* | Brazil (native) | Amazônia, Caatinga, Cerrado, Mata Atlântica, Pantanal |
| Amaranthaceae | *Iresine diffusa* | Brazil (native) | Amazônia, Caatinga, Cerrado, Mata Atlântica, Pantanal, Pampa |
| Amarylidaceae | *Crinum calamistratum* | Ethiopian |  |
| Amarylidaceae | *Crinum natans* | Ethiopian |  |
| Amarylidaceae | *Crinum thaianum* | Ethiopian |  |
| Amblystegiaceae | *Leptodictyum riparium* | Brazil (native) | Mata Atlântica, Pampa |
| Aneuraceae | *Riccardia chamedryfolia* | Brazil (native) | Cerrado, Mata Atlântica |
| Apiaceae | *Lilaeopsis brasiliensis* | Brazil (native) | Mata Atlântica |
| Apiaceae | *Lilaeopsis macloviana* | Australian |  |
| Apiaceae | *Lilaeopsis novae-zelandiae* | Australian |  |
| Aponogetonaceae | *Aponogeton boivinianus* | Ethiopian |  |
| Aponogetonaceae | *Aponogeton capuroni* | Ethiopian |  |
| Aponogetonaceae | *Aponogeton crispus* | Oriental |  |
| Aponogetonaceae | *Aponogeton elongatus* | Ethiopian |  |
| Aponogetonaceae | *Aponogeton longiplumulosus* | Ethiopian |  |
| Aponogetonaceae | *Aponogeton madagascariensis* | Ethiopian |  |
| Aponogetonaceae | *Aponogeton rigidifolius* | Oriental |  |
| Aponogetonaceae | *Aponogeton ulvaceus* | Ethiopian |  |
| Aponogetonaceae | *Aponogeton undulatus* | Oriental |  |
| Araceae | *Anubias barteri* | Ethiopian |  |
| Araceae | *Anubias afzellii* | Ethiopian |  |
| Araceae | *Anubias gracilis* | Ethiopian |  |
| Araceae | *Anubias hastifolia* | Ethiopian |  |
| Araceae | *Anubias lanceolata* | Ethiopian |  |
| Araceae | *Colocasia esculenta* | Palaearctic |  |
| Araceae | *Cryptocoryne affinis* | Oriental |  |
| Araceae | *Cryptocoryne albida* | Palaearctic |  |
| Araceae | *Cryptocoryne beckettii* | Oriental |  |
| Araceae | *Cryptocoryne ciliata* | Oriental |  |
| Araceae | *Cryptocoryne cordata* | Oriental |  |
| Araceae | *Cryptocoryne crispatula* | Oriental |  |
| Araceae | *Cryptocoryne gomezii* | Oriental |  |
| Araceae | *Cryptocoryne griffithii* | Oriental |  |
| Araceae | *Cryptocoryne lingua* | Oriental |  |
| Araceae | *Cryptocoryne x lucens* | Oriental |  |
| Araceae | *Cryptocoryne lutea* | Oriental |  |
| Araceae | *Cryptocoryne minima* | unknown/cosmopolitan |  |
| Araceae | *Cryptocoryne nurii* | unknown/cosmopolitan |  |
| Araceae | *Cryptocoryne parva* | Oriental |  |
| Araceae | *Cryptocoryne petchii* | Oriental |  |
| Araceae | *Cryptocoryne pontederiifolia* | Oriental |  |
| Araceae | *Cryptocoryne pygmaea* | Oriental |  |
| Araceae | *Cryptocoryne retrospiralis* | Oriental |  |
| Araceae | *Cryptocoryne spiralis* | Oriental |  |
| Araceae | *Cryptocoryne undulata* | Oriental |  |
| Araceae | *Cryptocoryne usteriana* | Oriental |  |
| Araceae | *Cryptocoryne walkeri* | Oriental |  |
| Araceae | *Cryptocoryne wendtii* | Oriental |  |
| Araceae | *Cryptocoryne x willisii* | Oriental |  |
| Araceae | *Lagenandra thwaitesii* | Oriental |  |
| Araceae | *Lemna minor* | unknown/cosmopolitan |  |
| Araceae | *Philodendron imbe* | Brazil (native) | Mata Atlântica |
| Araceae | *Pistia stratiotes* | Brazil (native) | Amazônia, Caatinga, Cerrado, Mata Atlântica, Pantanal |
| Araceae | *Scindapsus* sp. | unknown/cosmopolitan |  |
| Araceae | *Spathiphyllum wallisii* | Neotropical (out of Brazil) |  |
| Araceae | *Spirodela polyrhiza* | Neotropical (out of Brazil) |  |
| Araceae | *Syngonium podophyllum* | Neotropical (out of Brazil) |  |
| Araceae | *Typhonodorum lindleyanum* | Ethiopian |  |
| Araceae | *Wolffia* sp. | unknown/cosmopolitan |  |
| Araliaceae | *Hydrocotyle leucocephala* | unknown/cosmopolitan | Cerrado, Mata Atlântica |
| Araliaceae | *Hydrocotyle ramiflora* | Oriental |  |
| Araliaceae | *Hydrocotyle sibthorpioides* | Oriental |  |
| Araliaceae | *Hydrocotyle tripartita* | Palaearctic |  |
| Araliaceae | *Hydrocotyle umbellata* | Brazil (native) | Amazônia, Mata Atlântica |
| Araliaceae | *Hydrocotyle vulgaris* | Palaearctic |  |
| Asparagaceae | *Ophiopogon japonicus* | Palaearctic |  |
| Brassicaceae | *Cardamine lyrata* | Palaearctic |  |
| Cabombaceae | *Cabomba aquatica* | Brazil (native) | Amazônia, Mata Atlântica |
| Cabombaceae | *Cabomba carolineana* | Brazil (native) | Mata Atlântica, Pantanal |
| Cabombaceae | *Cabomba furcata* | Brazil (native) | Amazônia, Cerrado, Mata Atlântica |
| Campanulaceae | *Lobelia cardinalis* | Nearctic |  |
| Ceratophyllaceae | *Ceratophyllum demersum* | Brazil (native) | Mata Atlântica, Pampa, Pantanal |
| Characeae | *Chara fragilis* | unknown/cosmopolitan |  |
| Characeae | *Nitella flexillis* | Brazil (native) | Mata Atlântica |
| Cladophoraceae | *Cladophora aegagropila* | Palaearctic |  |
| Commelinaceae | *Callisia repens* | Brazil (native) | Caatinga, Mata Atlântica |
| Cyperaceae | *Cyperus helferi* | Oriental |  |
| Cyperaceae | *Cyperus involucratus* | Ethiopian |  |
| Cyperaceae | *Cyperus papyrus* | Palaearctic |  |
| Cyperaceae | *Cyperus alterniflorus* | Ethiopian |  |
| Cyperaceae | *Eleocharis acutangula* | Brazil (native) | Amazônia, Caatinga, Cerrado, Mata Atlântica, Pampa, Pantanal |
| Cyperaceae | *Eleocharis alta* | Oriental |  |
| Cyperaceae | *Eleocharis minima* | Brazil (native) | Amazônia, Caatinga, Cerrado, Mata Atlantica, Pampa |
| Cyperaceae | *Eleocharis parvula* | Brazil (native) | Mata Atlântica |
| Cyperaceae | *Eleocharis vivipara* | Nearctic |  |
| Cyperaceae | *Eleocharis yokoscensis* | Oriental |  |
| Dryopteridaceae | *Bolbitis heteroclita* | Oriental |  |
| Dryopteridaceae | *Bolbitis heudelotti* | Ethiopian |  |
| Elatinaceae | *Elatine triandra* | Palaearctic |  |
| Equisetaceae | *Equisetum*sp. | unknown/cosmopolitan |  |
| Eriocaulaceae | *Eriocaulon* sp. | unknown/cosmopolitan |  |
| Eriocaulaceae | *Tonina fluviatilis* | Brazil (native) | Amazônia, Caatinga, Mata Atlântica |
| Fissidentaceae | *Fissidens fontanus* | Nearctic |  |
| Fissidentaceae | *Fissidens nobilis* | Oriental |  |
| Fissidentaceae | *Fissidens subbranchyneuron* | unknown/cosmopolitan |  |
| Fissidentaceae | *Fissidens zollingeri* | Brazil (native) | Amazônia, Caatinga, Cerrado, Mata Atlântica, Pantanal |
| Haloragaceae | *Myriophyllum aquaticum* | Brazil (native) | Cerrado, Mata Atlântica, Pampa, Pantanal |
| Haloragaceae | *Myriophyllum hippuroides* | Nearctic |  |
| Haloragaceae | *Myriophyllum mattogrossensis* | Brazil (native) | Cerrado, Pantanal |
| Haloragaceae | *Myriophyllum pinnatum* | Nearctic |  |
| Haloragaceae | *Myriophyllum tuberculatum* | unknown/cosmopolitan |  |
| Haloragaceae | *Proserpinaca palustris* | Brazil (native) | Mata Atlântica |
| Hydrocharitaceae | *Najas microcarpa* | Brazil (native) | Amazônia, Cerrado, Pantanal |
| Hydrocharitaceae | *Blyxa aubertii* | Australian |  |
| Hydrocharitaceae | *Blyxa japonica* | Palaearctic |  |
| Hydrocharitaceae | *Egeria densa* | Brazil (native) | Caatinga, Cerrado, Mata Atlântica, Pampa |
| Hydrocharitaceae | *Elodea granatensis* | Brazil (native) | Amazônia, Caatinga, Cerrado, Mata Atlântica, Pantanal |
| Hydrocharitaceae | *Hydrilla verticillata* | Oriental |  |
| Hydrocharitaceae | *Hydrocharis dubia* | Oriental |  |
| Hydrocharitaceae | *Hydromystria laevigata* | Brazil (native) | Amazônia, Caatinga, Cerrado, Mata Atlântica, Pampa, Pantanal |
| Hydrocharitaceae | *Lagarosiphon madagascariensis* | Ethiopian |  |
| Hydrocharitaceae | *Lagarosiphon major* | Ethiopian |  |
| Hydrocharitaceae | *Najas guadalupensis* | Brazil (native) | Amazônia, Caatinga, Mata Atlântica, Pampa, Pantanal |
| Hydrocharitaceae | *Najas minor* | Oriental |  |
| Hydrocharitaceae | *Ottelia alismoides* | Australian |  |
| Hydrocharitaceae | *Vallisneria americana* | Oriental |  |
| Hydrocharitaceae | *Vallisneria nana* | Australian |  |
| Hydrocharitaceae | *Vallisneria natans* | Oriental |  |
| Hypnaceae | *Isopterygium subbrevisetum* | Brazil (native) | Amazônia, Mata Atlântica |
| Hypnaceae | *Pseudotaxiphyllum distichaceum* | unknown/cosmopolitan |  |
| Hypnaceae | *Taxiphyllum alternans* | Palaearctic |  |
| Hypnaceae | *Taxiphyllum barbieri* | Palaearctic |  |
| Hypnaceae | *Vesicularia dubyana* | Oriental |  |
| Hypnaceae | *Vesicularia ferriei* | Palaearctic |  |
| Hypnaceae | *Vesicularia montagnei* | Palaearctic |  |
| Hypnaceae | *Vesicularia reticulata* | Oriental |  |
| Hypnaceae | *Vesicularia vesicularis* | Brazil (native) | Amazonia, Cerrado, Mata Atlântica, Pantanal |
| Isoetaceae | *Isoetes*sp. | unknown/cosmopolitan |  |
| Juncaceae | *Juncus repens* | Nearctic |  |
| Lamiaceae | *Dysophylla stellata* | Palaearctic |  |
| Lamiaceae | *Eusteralis verticillata* | unknown/cosmopolitan |  |
| Lamiaceae | *Hyptis lorentziana* | Brazil (native) | Amazônia, Cerrado, Mata Atlântica, Pantanal |
| Lamiaceae | *Pogostemon helferi* | unknown/cosmopolitan |  |
| Lentibulariaceae | *Utricularia foliosa* | Brazil (native) | Amazonia, Caatinga, Cerrado, Mata Atlântica, Pantanal |
| Lentibulariaceae | *Utricularia graminifolia* | Palaearctic |  |
| Lentibulariaceae | *Utricularia gibba* | Brazil (native) | Amazonia, Caatinga, Cerrado, Mata Atlântica, Pantanal |
| Leujeneaceae | *Lejeunea*sp. | unknown/cosmopolitan |  |
| Linderniaceae | *Hemianthus callitrichoides* | Neotropical (out of Brazil) |  |
| Linderniaceae | *Hemianthus micranthemoides* | Nearctic |  |
| Linderniaceae | *Lindernia microcalyx* | Neotropical (out of Brazil) |  |
| Linderniaceae | *Micranthemum umbrosum* | Brazil (native) | Amazônia, Caatinga, Mata Atlântica, Pampa |
| Lomariopsidaceae | *Lomariopsis lineata* | Palaearctic |  |
| Lythraceae | *Ammannia gracilis* | Ethiopian |  |
| Lythraceae | *Ammannia auriculata* | Brazil (native) | Mata Atlântica |
| Lythraceae | *Ammania crassicaulis* | Ethiopian |  |
| Lythraceae | *Ammannia prieuriana* | Ethiopian |  |
| Lythraceae | *Ammannia pedicellata* | Ethiopian |  |
| Lythraceae | *Ammannia senegalensis* | Ethiopian |  |
| Lythraceae | *Cuphea anagalloidea* | Brazil (native) | Amazônia, Caatinga, Cerrado, Mata Atlântica |
| Lythraceae | *Didipilis diandra* | Nearctic |  |
| Lythraceae | *Rotala indica* | unknown/cosmopolitan |  |
| Lythraceae | *Rotala mexicana* | Brazil (native) | Amazônia |
| Lythraceae | *Rotala repens* | unknown/cosmopolitan |  |
| Lythraceae | *Rotala rotundifolia* | Oriental |  |
| Lythraceae | *Rotala wallichii* | Oriental |  |
| Lythraceae | *Trapa natans* | unknown/cosmopolitan |  |
| Marsileceae | *Marsilea angustifolia* | Australian |  |
| Marsileceae | *Marsilea crenata* | Australian |  |
| Marsileceae | *Marsilea hirsuta* | unknown/cosmopolitan |  |
| Marsiliaceae | *Marsilea minuta* | Palaearctic |  |
| Mayacaceae | *Mayaca fluviatilis* | Brazil (native) | Amazônia, Caatinga, Cerrado, Mata Atlântica, Pantanal |
| Mayacaceae | *Mayaca sellowiana* | Brazil (native) | Amazônia, Caatinga, Cerrado, Mata Atlântica, Pantanal, Pampa |
| Menyanthaceae | *Nymphoides aquatica* | Nearctic |  |
| Menyanthaceae | *Nymphoides cristata* | Palaearctic |  |
| Menyanthaceae | *Nymphoides humboldtiana* | Brazil (native) | Amazônia, Caatinga, Cerrado, Mata Atlântica, Pampa, Pantanal |
| Menyanthaceae | *Nymphoides hydrocleys* | unknown/cosmopolitan |  |
| Menyanthaceae | *Nymphoides indica* | unknown/cosmopolitan |  |
| Monosoleniaceae | *Monosolenium tenerum* | Palaearctic |  |
| Nelumbonaceae | *Nelumbo nucifera* | unknown/cosmopolitan |  |
| Nymphaeaceae | *Hydrostemma longifolium* | Oriental |  |
| Nymphaeaceae | *Nuphar japonica* | Palaearctic |  |
| Nymphaeaceae | *Nymphaea alba* | Palaearctic |  |
| Nymphaeaceae | *Nymphaea amazonum* | Brazil (native) | Amazônia, Caatinga,Cerrado, Mata Atlântica, Pampa, Pantanal |
| Nymphaeaceae | *Nymphaea caerulea* | Brazil (native) | Caatinga, Mata Atlântica |
| Nymphaeaceae | *Nymphaea colorata* | Ethiopian |  |
| Nymphaeaceae | *Nymphaea gardneriana* | Brazil (native) | Amazônia, Cerrado, Mata Atlântica |
| Nymphaeaceae | *Nymphaea jamesoniana* | Brazil (native) | Caatinga, Cerrado, Mata Atlântica, Pantanal |
| Nymphaeaceae | *Nymphaea lotus* | Ethiopian |  |
| Nymphaeaceae | *Nymphaea micrantha* | Ethiopian |  |
| Nymphaeaceae | *Nymphaea odorata* | Nearctic |  |
| Nymphaeaceae | *Nymphaea rubra* | Brazil (native) | Amazônia, Caatinga, Mata Atlântica |
| Nymphaeaceae | *Nymphaea zenkeri* | Ethiopian |  |
| Nympheaceae | *Victoria amazonica* | Brazil (native) | Amazônia, Pantanal |
| Onagraceae | *Ludwigia arcuata* | Nearctic |  |
| Onagraceae | *Ludwigia brevipes* | Nearctic |  |
| Onagraceae | *Ludwigia glandulosa* | unknown/cosmopolitan |  |
| Onagraceae | *Ludwigia inclinata* | Brazil (native) | Amazônia, Caatinga, Cerrado, Pantanal |
| Onagraceae | *Ludwigia leptocarpa* | Brazil (native) | Amazônia, Caatinga, Cerrado, Mata Atlântica, Pantanal |
| Onagraceae | *Ludwigia mullertii* | Nearctic |  |
| Onagraceae | *Ludwigia natans* | Nearctic |  |
| Onagraceae | *Ludwigia ovalis* | Palaearctic |  |
| Onagraceae | *Ludwigia peploides* | Brazil (native) | Mata Atlântica |
| Onagraceae | *Ludwigia palustris* | Nearctic |  |
| Onagraceae | *Ludwigia sedoides* | Brazil (native) | Amazônia, Cerrado, Mata Atlântica |
| Oxalidaceae | *Oxalis tetraphylla* | Neotropical (out of Brazil) |  |
| Oxalidaceae | *Oxalis triangularis* | Brazil (native) | Amazônia, Caatinga, Cerrado, Mata Atlântica, Pampa |
| Phrymaceae | *Glossostigma elatinoides* | Australian |  |
| Phyllanthaceae | *Phyllanthus fluitans* | Brazil (native) | Amazônia, Cerrado, Pantanal |
| Plantaginaceae | *Bacopa amplexicaulis* | Nearctic |  |
| Plantaginaceae | *Bacopa australis* | Brazil (native) | Mata Atlântica, Pantanal, Cerrado |
| Plantaginaceae | *Bacopa arenaria* | Brazil (native) | Amazônia, Pantanal, Cerrado |
| Plantaginaceae | *Bacopa caroliniana* | Brazil (native) | Caatinga, Cerrado |
| Plantaginaceae | *Bacopa lanigera* | Brazil (native) | Mata Atlântica |
| Plantaginaceae | *Bacopa monnieri* | Brazil (native) | Caatinga, Mata Atlântica |
| Plantaginaceae | *Bacopa myriophylloides* | Brazil (native) | Amazônia, Cerrado, Pantanal |
| Plantaginaceae | *Bacopa rotundifolia* | Brazil (native) | Cerrado, Pantanal |
| Plantaginaceae | *Bacopa salzmannii* | Brazil (native) | Amazônia, Caatinga, Cerrado, Mata Atlântica, Pantanal |
| Plantaginaceae | *Callitriche stagnalis* | Brazil (native) | Mata Atlântica |
| Plantaginaceae | *Limnophila aquatica* | Palaearctic |  |
| Plantaginaceae | *Limnophila aromatica* | Palaearctic |  |
| Plantaginaceae | *Limnophila hippuroides* | Palaearctic |  |
| Plantaginaceae | *Limnophila sessiliflora* | Oriental |  |
| Polypodiaceae | *Colysis pteropus* | unknown/cosmopolitan |  |
| Polypodiaceae | 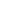   | *Microsorum pteropus* | | --- | | Oriental |  |
| Pontederiaceae | *Eichhornia azurea* | Brazil (native) | Amazônia, Caatinga, Cerrado, Mata Atlântica, Pampa, Pantanal |
| Pontederiaceae | *Eichhornia crassipes* | Brazil (native) | Amazônia, Caatinga, Cerrado, Mata Atlântica, Pampa, Pantanal |
| Pontederiaceae | *Eichhornia diversifolia* | Brazil (native) | Amazônia, Caatinga, Cerrado, Mata Atlântica |
| Pontederiaceae | *Heteranthera dubia* | Nearctic |  |
| Pontederiaceae | *Heteranthera reniformis* | Brazil (native) | Amazônia, Caatinga, Cerrado, Mata Atlântica, Pampa, Pantanal |
| Pontederiaceae | *Heteranthera zosterifolia* | Brazil (native) | Amazônia, Caatinga, Cerrado, Mata Atlântica, Pampa, Pantanal |
| Potamogetonaceae | *Potamogeton coloratus* | unknown/cosmopolitan |  |
| Potamogetonaceae | *Potamogeton crispus* | Neotropical (out of Brazil) |  |
| Potamogetonaceae | *Potamogeton gayi* | Brazil (native) | Mata Atlântica |
| Potamogetonaceae | *Potamogeton illinoensis* | Brazil (native) | Amazônia, Caatinga, Mata Atlântica, Pantanal, Pampa |
| Potamogetonaceae | *Potamogeton lucens* | unknown/cosmopolitan |  |
| Potamogetonaceae | *Potamogeton perfoliatus* | Nearctic |  |
| Primulaceae | *Hottonia palustris* | unknown/cosmopolitan |  |
| Primulaceae | *Lysimachia nummularia* | Palaearctic |  |
| Primulaceae | *Samolus valerandi* | Brazil (native) | Mata Atlântica |
| Pteridaceae | *Ceratopteris thalictroides* | Oriental |  |
| Ranunculaceae | *Ranunculus inundatus* | Australian |  |
| Ranunculaceae | *Ranunculus papulentus* | Australian |  |
| Ricciaceae | *Riccia fluitans* | unknown/cosmopolitan |  |
| Ricciaceae | *Riccia stenophylla* | Brazil (native) | Caatinga, Cerrado, Mata Atlântica, Pantanal, Pampa |
| Rubiaceae | *Oldenlandia salzmannii* | Brazil (native) | Caatinga, Cerrado, Mata Atlântica |
| Salviniaceae | *Azolla filliculoides* | Brazil (native) | Caatinga, Mata Atlântica, Pantanal |
| Salviniaceae | *Azolla africana* | Ethiopian |  |
| Salviniaceae | *Salvinia adnata* | Brazil (native) | Mata Atlântica |
| Salviniaceae | *Salvinia auriculata* | Brazil (native) | Amazônia, Cerrado, Mata Atlântica, Pantanal |
| Salviniaceae | *Salvinia cucullata* | Oriental |  |
| Salviniaceae | *Salvinia natans* | Palaearctic |  |
| Saururaceae | *Saururus cernuus* | Nearctic |  |
| Xyridaceae | *Xyris*sp. | unknown/cosmopolitan |  |
